# Supplementary material for: MiR-338-3p inhibits epithelial-mesenchymal transition in gastric cancer cells by targeting ZEB2 and MACC1/Met/Akt signaling
Source: PubMed Central journal article supplement (PMC4558147; doi:10.18632/oncotarget.3835), 2015-04-14
Supplement: oncotarget-06-15222-s001.pdf [file oncotarget-06-15222-s001.pdf]

## MiR-338-3p inhibits epithelial-mesenchymal transition in gastric cancer cells by targeting ZEB2 and MACC1/Met/Akt signaling

### Supplementary Material

#### Supplementary Table 1

The sequences of primer used for dual-luciferase reporter plasmid.

| Primer           | Forward (5'-3')                                                | Reverse (5'-3')                                                  |
|------------------|----------------------------------------------------------------|------------------------------------------------------------------|
| <b>ZEB2</b>      | TAAACTACTGCATTTTAAGC<br>TTCCTATTT                              | ACTGAAAAACTGTCTTAGAAAATCA<br>CG                                  |
| <b>Mut ZEB2</b>  | AATTTCTTTTGAAAATGACC<br><u>TACGAGCAATAAAAATGTA</u><br>GCCAAACT | AGTTTGGCTACATTTTATT <u>GCTCGT</u><br><u>AGGTCATTTTCAAAGAAATT</u> |
| <b>MACC1</b>     | CCGCTCGAGGGAGCTGAAT<br>AGGTGCAGAT                              | ATAAGAATGCGGCCGCCTGCCTCAG<br>CCTCCTGAGTA                         |
| <b>Mut MACC1</b> | CCACCCTGGGATATTTGGTA<br>TGCC <u>ACCAATGGTAATTCAA</u><br>ATT    | AATTTGAATTACCATTG <u>GTGGC</u> CATAC<br>CAAATATCCCAGGGTGG        |

## Supplementary Table 2

### The sequences of primer used for qRT-PCR.

| <b>Primer</b>                   | <b>Forward (5' -3')</b> | <b>Reverse (5' -3')</b> |
|---------------------------------|-------------------------|-------------------------|
| <b>E-cadherin</b>               | CTGCTGCAGGTCTCCTCTTG    | TGTCGACCGGTGCAATCTTC    |
| <b>N-cadherin</b>               | ACAGTGGCCACCTACAAAGG    | CCGAGATGGGGTTGATAATG    |
| <b>Fibronectin</b>              | GACCACATCGAGCGGATCTG    | GTCTCTTGGCAGCTGACTCC    |
| <b>Vimentin</b>                 | AAGGCGAGGAGAGCAGGATT    | GGTCATCGTGATGCTGAGAAG   |
| <b>ZEB2</b>                     | CTCTTCCCACACGCTTAGTT    | GGCCTAAGCTTACAGTGTCATG  |
| <b><math>\beta</math>-actin</b> | TGGATCAGCAAGCAGGAGTA    | TCGGCCACATTGTGAACTTT    |

## Supplementary Results

**Supplementary Table 3**

**Clinicopathological characteristics of GC patients**

---

| <b>Case</b> | <b>Age</b> | <b>Gender</b> | <b>Histological differentiation</b> | <b>Clinical stage</b> | <b>T classification</b> | <b>N classification</b> | <b>Metastasis</b> |
|-------------|------------|---------------|-------------------------------------|-----------------------|-------------------------|-------------------------|-------------------|
| <b>1</b>    | 74         | Male          | Moderately                          | IV                    | T4b                     | N1                      | Yes               |
| <b>2</b>    | 53         | Male          | Poorly                              | IIIC                  | T4b                     | N3                      | No                |
| <b>3</b>    | 71         | Male          | Moderately                          | IIB                   | T4a                     | N0                      | No                |
| <b>4</b>    | 55         | Male          | Poorly                              | IV                    | T4a                     | N1                      | Yes               |
| <b>5</b>    | 69         | Male          | Poorly                              | IIA                   | T2                      | N1                      | No                |
| <b>6</b>    | 44         | Male          | Poorly                              | IIIB                  | T4a                     | N2                      | No                |
| <b>7</b>    | 62         | Female        | Well                                | IA                    | T1b                     | N0                      | No                |
| <b>8</b>    | 46         | Male          | Poorly                              | IIA                   | T1b                     | N2                      | No                |
| <b>9</b>    | 70         | Male          | Poorly                              | IIB                   | T2                      | N2                      | No                |

---

---

|           |    |        |            |      |     |    |    |
|-----------|----|--------|------------|------|-----|----|----|
| <b>10</b> | 79 | Male   | Poorly     | IB   | T2  | N0 | No |
| <b>11</b> | 41 | Male   | Poorly     | IA   | T1b | N0 | No |
| <b>12</b> | 56 | Male   | Well       | IB   | T2  | N0 | No |
| <b>13</b> | 77 | Male   | Poorly     | IIIC | T4a | N3 | No |
| <b>14</b> | 57 | Male   | Poorly     | IIIB | T4b | N1 | No |
| <b>15</b> | 73 | Male   | Moderately | IIIA | T4a | N1 | No |
| <b>16</b> | 51 | Female | Poorly     | IIIA | T4a | N1 | No |
| <b>17</b> | 61 | Male   | Moderately | IIA  | T2  | N1 | No |
| <b>18</b> | 58 | Female | Poorly     | IIIB | T4a | N2 | No |
| <b>19</b> | 78 | Male   | Moderately | IIIC | T4b | N2 | No |
| <b>20</b> | 48 | Male   | Poorly     | IIIA | T4a | N1 | No |

---

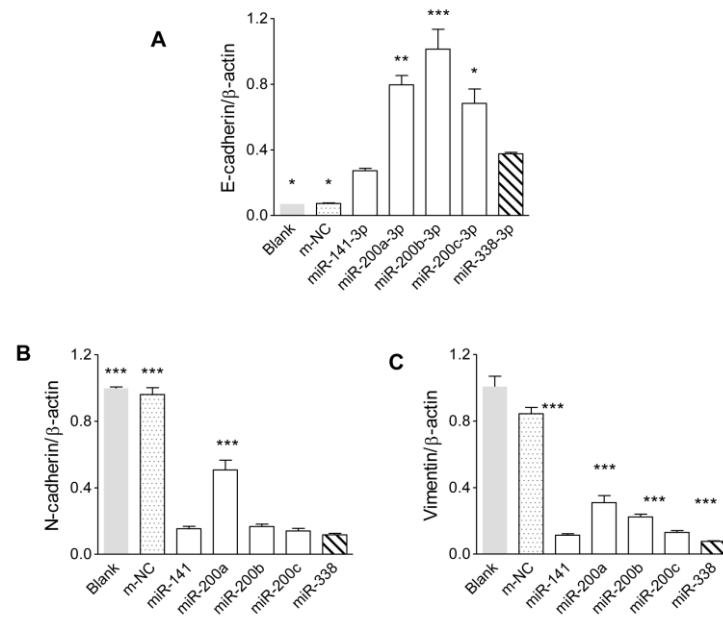

**Figure S1. E-cadherin, N-cadherin, and vimentin mRNA expression levels in MKN-28 cells transfected with miR-200 family (miR-200a-3p, miR-200b-3p, miR-200c-3p and miR-141-3p) mimics or miR-338-3p mimics by qRT-PCR.**

(A) Compared with miR-338-3p, the expression of E-cadherin mRNA was significantly increased in MKN-28 cells transfected with miR-200b-3p, miR-200a-3p, or miR-200c-3p. (B and C) N-cadherin and vimentin mRNA levels in miR-338-3p-transfected cells were lower than the levels in miR-200a-3p-transfected cells.

\* $P < 0.05$ , \*\* $P < 0.01$  and \*\*\* $P < 0.001$ .

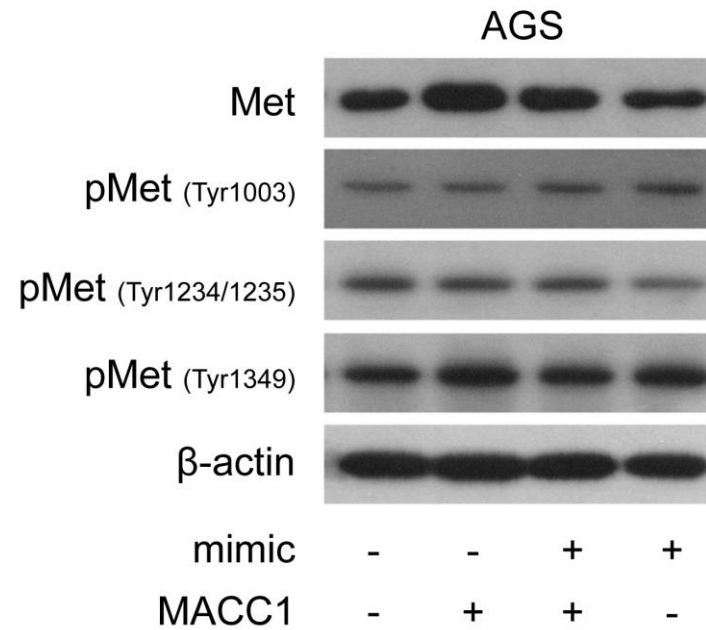

**Figure S2. Western blot analysis of MACC1, Met and p-Met protein expression in AGS cells.**

MiR-338-3p decreased Met and pMet (Tyr1234/1235) expression. Restoring MACC1 expression increased the protein expression of Met and pMet (Tyr1234/1235) in mimic transfected cells.

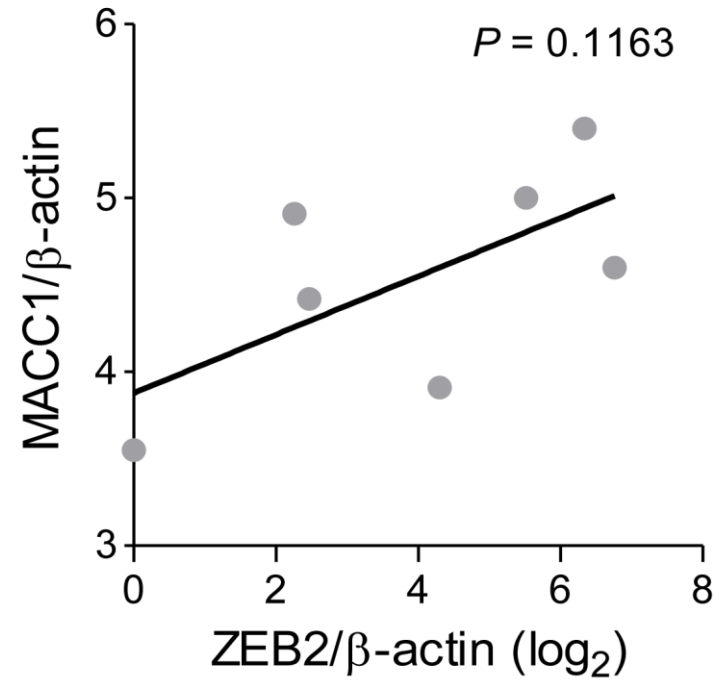

**Figure S3. No significant correlation was found between MACC1 and ZEB2.**
